# Supplementary material for: Surface modified titanium dioxide using transition metals: nickel as a winning transition metal for solar light photocatalysis
Source: Royal Society of Chemistry journal article supplement (doi:10.1039/c7ta07176k), 2018-01-01
Supplement: c7ta07176k1.pdf [file c7ta07176k1.pdf]

## Supporting Information

# Surface modified titanium dioxide by transition metals: nickel as a winning transition metal for solar light photocatalysis

Andraž Šuligoj,<sup>a,b</sup> Iztok Arčon,<sup>c,d</sup> Matjaž Mazaj,<sup>a</sup> Goran Dražič,<sup>e</sup> Denis Arčon,<sup>g</sup> Pegie Cool,<sup>f</sup>  
Urška Lavrenčič Štangar<sup>b,c</sup> and Nataša Novak Tušar<sup>a,c</sup>

---

<sup>a</sup>Department of Inorganic Chemistry and Technology, National Institute of Chemistry,  
Hajdrihova 19, SI-1001 Ljubljana, Slovenia

<sup>b</sup>Faculty of Chemistry and Chemical Technology, University of Ljubljana, Večna Pot 113,  
1000 Ljubljana, Slovenia

<sup>c</sup>University of Nova Gorica, Vipavska 13, SI-1001 Nova Gorica, Slovenia

<sup>d</sup>Department for low and intermediate energy physics, Jozef Stefan Institute, Jamova 39, SI-  
1000 Ljubljana, Slovenia

<sup>e</sup>Department of Materials Chemistry, National Institute of Chemistry, Hajdrihova 19, SI-  
1001 Ljubljana, Slovenia

<sup>f</sup>Laboratory for Adsorption and Catalysis, Department of Chemistry, University of Antwerp,  
Campus Drie Eiken, Universiteitsplein 1, , 2610 Wilrijk, Belgium

<sup>g</sup>Condensed Matter Physics, Jožef Stefan Institute, Jamova 39, SI-1000 Ljubljana, Slovenia

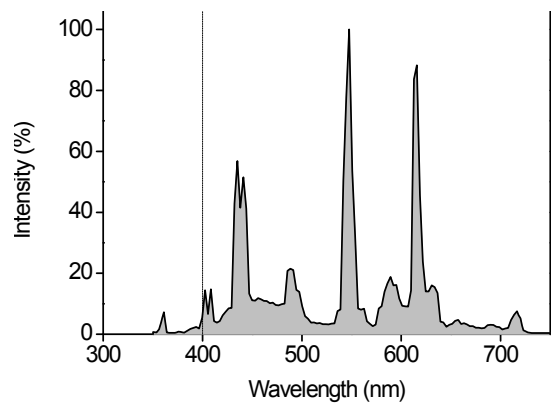

**Fig. S1.** Spectrum of the solar lamps used in Rz ink and TPA test. The dashed line shows the UV cutoff filter applied in visible-light tests.

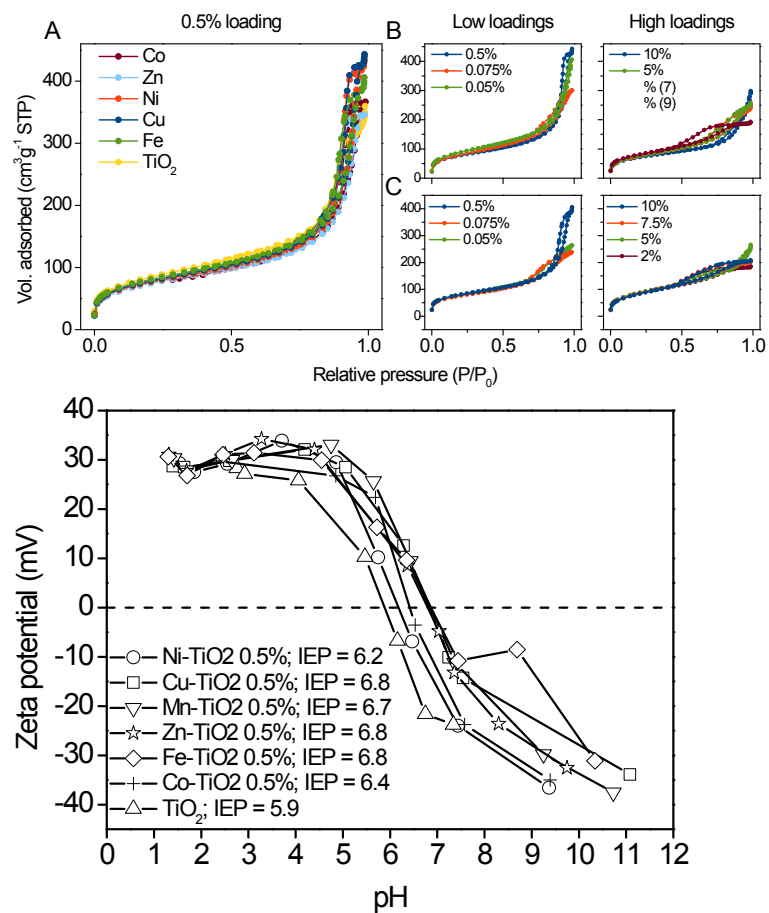

**Fig. S2.** Top –  $\text{N}_2$ -sorption isotherms of metal grafted  $\text{TiO}_2$  (a). (b) and (c) show isotherms of low and high concentration Cu and Fe-grafted  $\text{TiO}_2$ , respectively. Bottom – Zeta potential measurements of titania with its surface modified with selected transition metals.

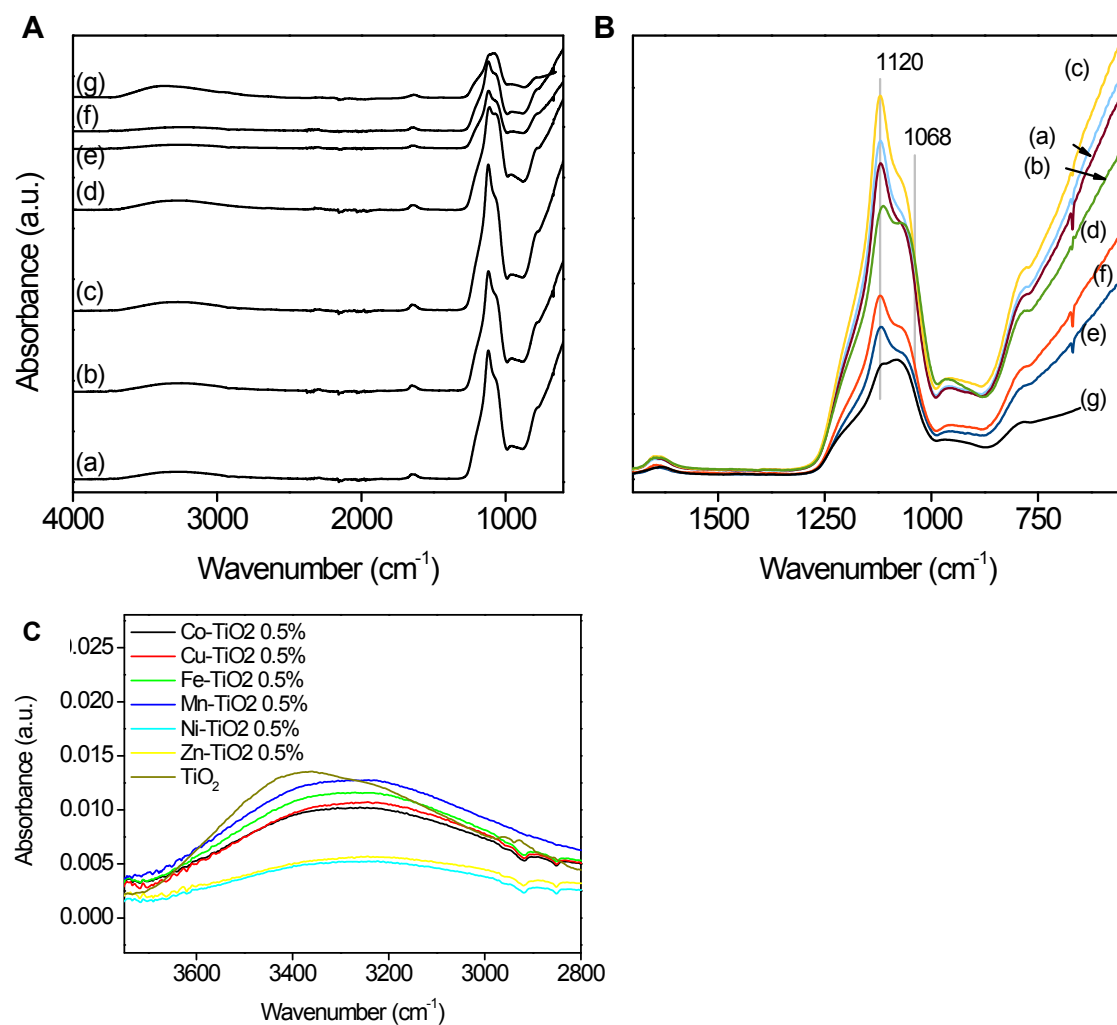

**Fig. S3.** ATR FT-IR spectra of  $\text{TiO}_2\text{-SiO}_2$  films (A) near IR range and (B) 1600–600  $\text{cm}^{-1}$  range. Asymmetric Si–O–Si stretching is labeled at 1120  $\text{cm}^{-1}$ . Samples are labelled (a) Co-TiO<sub>2</sub> 0.5%, (b) Cu-TiO<sub>2</sub> 0.5%, (c) Fe-TiO<sub>2</sub> 0.5%, (d) Mn-TiO<sub>2</sub> 0.5%, (e) Ni-TiO<sub>2</sub> 0.5%, (f) Zn-TiO<sub>2</sub> 0.5%, (g) unmodified TiO<sub>2</sub>. In plot (C) a closer view in the 3700–2800  $\text{cm}^{-1}$  range is shown. Note the lower intensity of the 3350  $\text{cm}^{-1}$  band in Ni- and Zn-modified samples.

XANES spectra were taken to elucidate the oxidation states of nanoclusters on the TiO<sub>2</sub> surface.

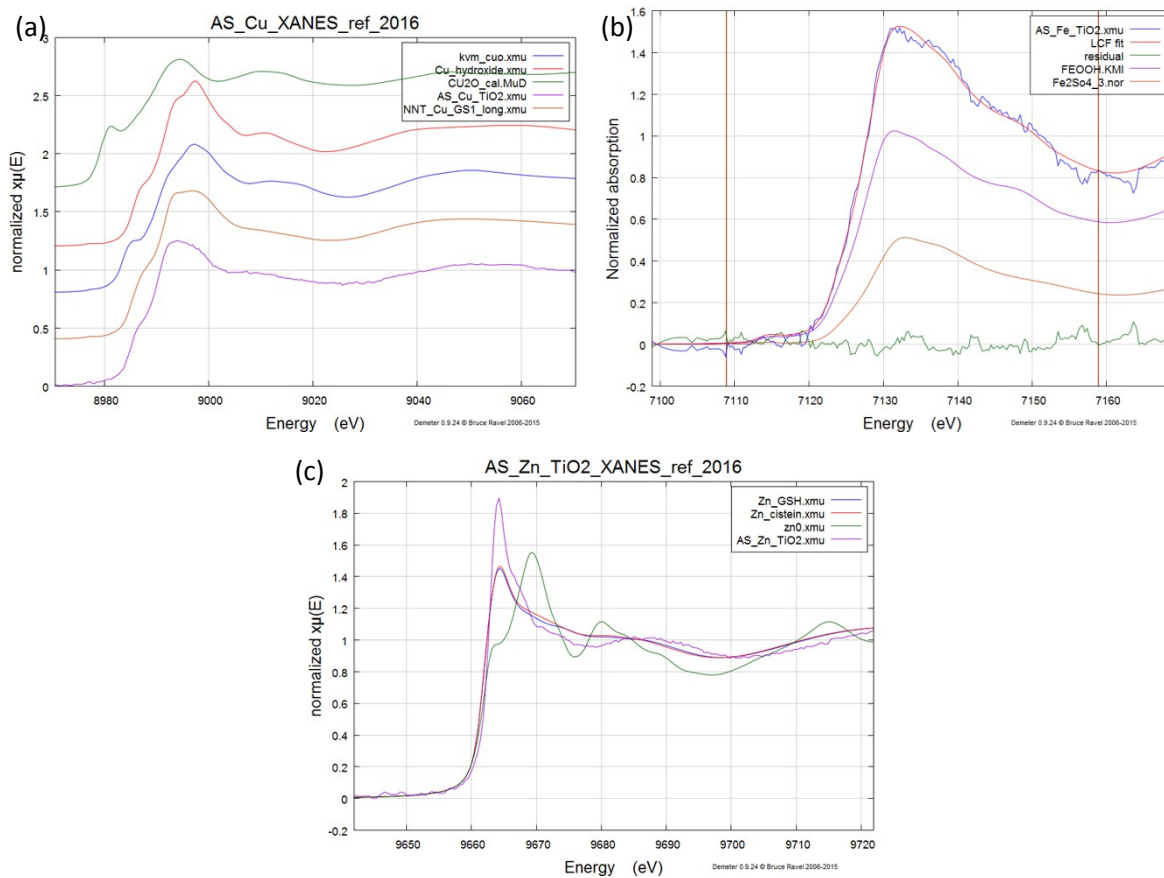

**Fig. S4.** XANES spectra of (a) Cu-TiO<sub>2</sub> 0.5%, (b) Fe-TiO<sub>2</sub> 0.5% and (c) Zn-TiO<sub>2</sub> 0.5% samples.

**Table S1.** Most common oxidation states of 3d ions.

| Ox. # | Ti | V | Cr | Mn | Fe | Co | Ni | Cu | Zn |
|-------|----|---|----|----|----|----|----|----|----|
| +1    |    |   |    |    |    |    | x  | x  |    |
| +2    | x  | x | x  | x  | x  | x  | x  | x  | x  |
| +3    | x  | x | x  | x  | x  | x  | x  | x  |    |
| +4    | x  | x |    | x  | x  | x  |    |    |    |
| +5    |    | x | x  | x  |    |    |    |    |    |
| +6    |    |   | x  | x  | x  |    |    |    |    |
| +7    |    |   |    | x  |    |    |    |    |    |

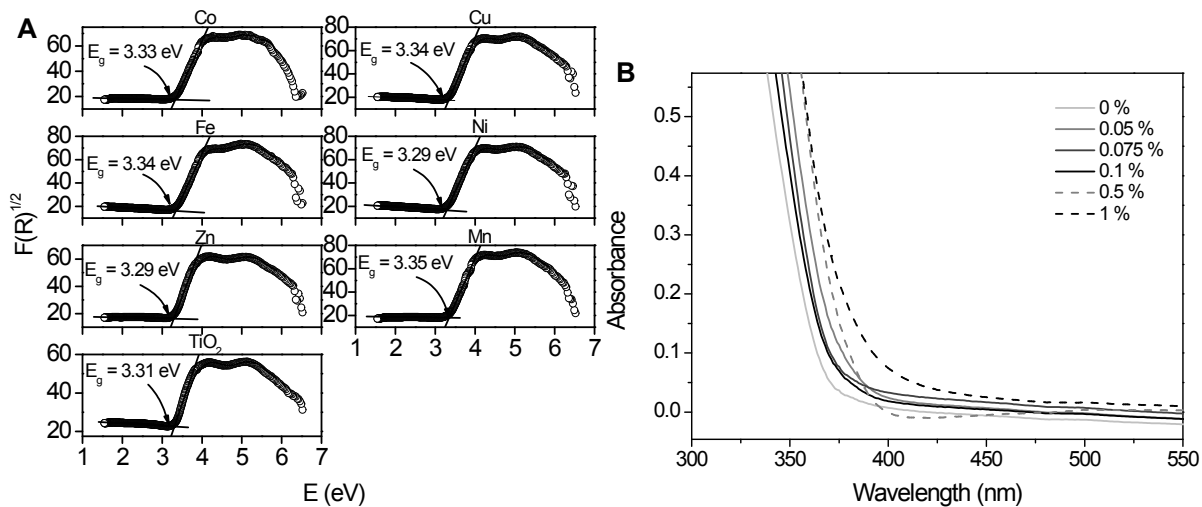

**Fig. S5.** Diffuse reflectance data of the films; (a) Tauc plots of the films and (b) true absorbance for nickel modified sample series in the concentration range 0 to 1 wt.%. Note the non-linear red-shift of the absorption in (b) suggesting that Ni-ions were not included in the TiO<sub>2</sub> lattice.

**Table S2.** Values of indirect band gap for concentration series of Fe<sup>3+</sup>- and Cu<sup>2+</sup>-modified titania films. The values were obtained by plotting the Kubelka-Munk-transformed reflectance spectra of the films. Then the onsets in the K-M-transformed plots were taken as the E<sub>g</sub> values.

| Sample (x-TiO <sub>2</sub> ) | Indirect band gap (eV) |
|------------------------------|------------------------|
| 0.05% Fe <sup>3+</sup>       | 3.05                   |
| 0.075% Fe <sup>3+</sup>      | 3.18                   |
| 0.1% Fe <sup>3+</sup>        | 3.29                   |
| 0.5% Fe <sup>3+</sup>        | 3.34                   |
| 2% Fe <sup>3+</sup>          | 3.00                   |
| 5% Fe <sup>3+</sup>          | 3.06                   |
| 7.5% Fe <sup>3+</sup>        | 3.08                   |
| 10% Fe <sup>3+</sup>         | 2.90                   |
| 0.05% Cu <sup>2+</sup>       | 3.35                   |
| 0.075% Cu <sup>2+</sup>      | 3.28                   |
| 0.1% Cu <sup>2+</sup>        | 3.31                   |
| 0.5% Cu <sup>2+</sup>        | 3.34                   |
| 2% Cu <sup>2+</sup>          | 3.22                   |
| 5% Cu <sup>2+</sup>          | 3.33                   |
| 7.5% Cu <sup>2+</sup>        | 3.34                   |
| 10% Cu <sup>2+</sup>         | 3.40                   |



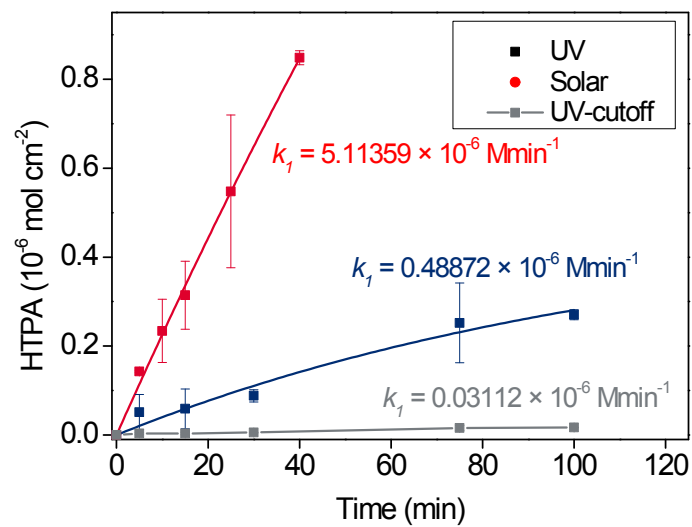

**Fig. S6.** Formation of HTPA from TPA for TiO<sub>2</sub> modified with 2 wt.% Fe under visible (grey), solar (blue) and UVA (red) irradiation.

**Table S3.** HTPA formation rate constants under solar and under visible light illumination.

| Sample<br>(x-TiO <sub>2</sub> ) | HTPA formation<br>( $\times 10^{-9}$ M/min) |         |
|---------------------------------|---------------------------------------------|---------|
|                                 | Solar                                       | Visible |
| Mn                              | 7.16                                        | 0.45    |
| Fe                              | 39.94                                       | 2.56    |
| Co                              | 20.98                                       | 1.33    |
| Ni                              | 68.13                                       | 4.57    |
| Cu                              | 18.43                                       | 1.08    |
| Zn                              | 92.80                                       | 6.44    |

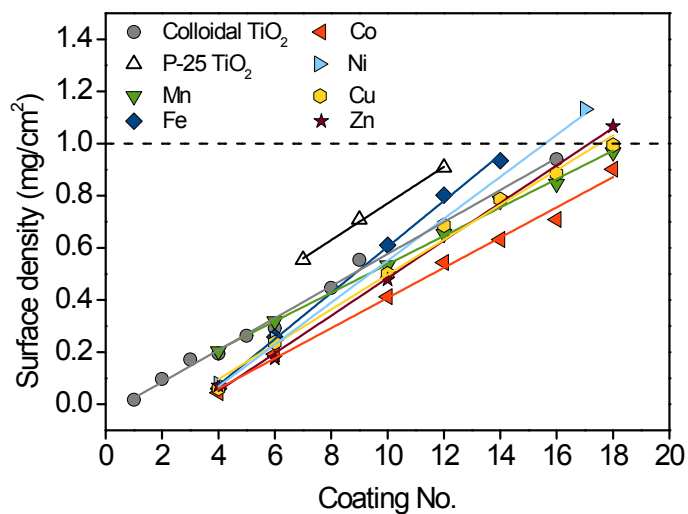

**Fig. S7.** Surface density of TiO<sub>2</sub> laid on glass substrate as a function of number of coatings. The dashed line represents 1 mg/cm<sup>2</sup> benchmark, where the activity reaches the plateau, i.e. further increasing of mass does not increase the photoactivity. TiO<sub>2</sub> samples were modified with 0.5 wt.% of transition metal chosen.

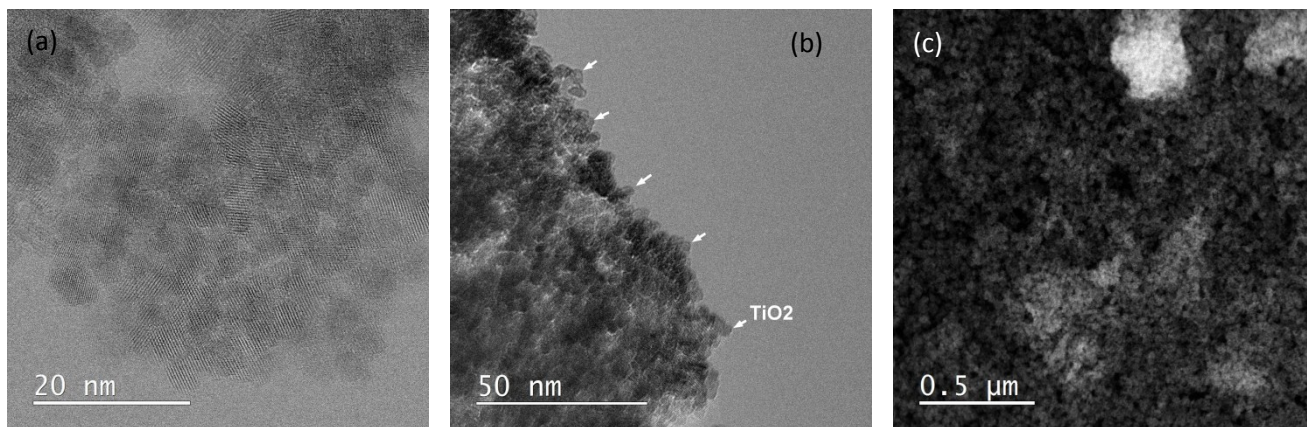

**Fig. S8.** TEM micrographs of Cu-modified sample. (a) and (b) bright-field micrographs and (c) dark-field.

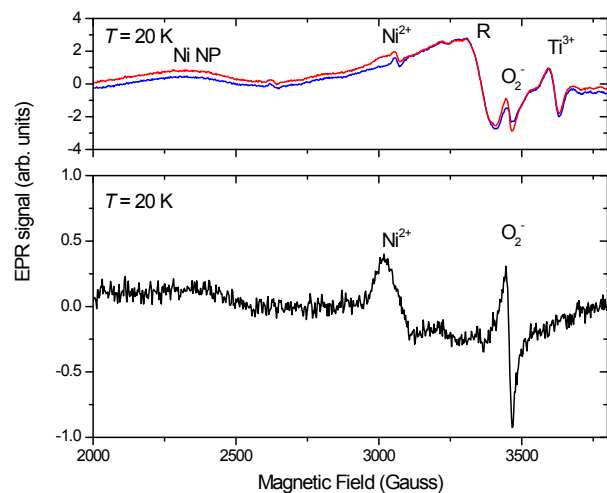

**Fig. S9.** EPR spectra of Ni-TiO<sub>2</sub> 1% at 20 K; blue and red colours in the upper plot represent spectra with the light on and off, respectively; the lower plot denotes the difference between the two.
